# Supplementary material for: TheDrosophilaBub3 protein is required for the mitotic checkpoint and for normal accumulation of cyclins during G2 and early stages of mitosis
Source: Oxford University Press journal article supplement (doi:10.1242/jcs.01602), 2004-12-22
Supplement: jcs01602suppltables.pdf [file jcs01602suppltables.pdf]

**Table S1. Quantification of mitotic parameters in wild-type and *bub3<sup>1</sup>* mutant brains.**

| Genotype <sup>a</sup>                    | Time in colchicine (minutes) | Optical fields | Mitotic Figures | Prophase (number of cells) | %    | Prometaphase (number of cells) | %    | SCS (number of cells) | %    | Mitotic Index |
|------------------------------------------|------------------------------|----------------|-----------------|----------------------------|------|--------------------------------|------|-----------------------|------|---------------|
| <i>Oregon R</i>                          | 0                            | 4478           | 3795            | 617                        | 16.3 | 2366                           | 62.3 | 812                   | 21.4 | 0.85          |
|                                          | 60                           | 1798           | 1876            | 174                        | 4.5  | 3675                           | 94.8 | 27                    | 0.7  | 2.16          |
| <i>bub3<sup>1</sup>/bub3<sup>1</sup></i> | 0                            | 2498           | 1390            | 211                        | 15.2 | 833                            | 59.9 | 117                   | 24.9 | 0.56          |
|                                          | 60                           | 1102           | 493             | 70                         | 14.2 | 348                            | 70.6 | 75                    | 15.2 | 0.45          |
| <i>bub3<sup>1</sup>/Df(3R)Dr-rv1</i>     | 0                            | 1936           | 1090            | 280                        | 25.7 | 520                            | 47.7 | 290                   | 26.6 | 0.56          |
|                                          | 60                           | 1570           | 717             | 83                         | 11.6 | 457                            | 63.7 | 177                   | 24.7 | 0.46          |

<sup>a</sup>Ten brains were scored for each genotype. Oregon R, wild-type control. SCS, sister chromatid separation.

**Table S2. Quantification of cyclin B levels in cells with and without Bub3 after colchicine incubation.**

|                                | <b>G1/S</b>             | <b>G2</b>                  | <b>Mitosis</b>              |
|--------------------------------|-------------------------|----------------------------|-----------------------------|
| <b><i>Oregon R</i></b>         | 20.86 ± 3.16<br>(n=66)  | 33.66 ± 9.50<br>(n=162)    | 34.50 ± 9.15<br>(n=99)      |
| <b><i>bub3<sup>1</sup></i></b> | 21.98 ± 4.59<br>(n=42)  | 29.05 ± 17**<br>(n=187)    | 28.00 ± 10.73***<br>(n=133) |
| <b>Control</b>                 | 33.41 ± 9.13<br>(n=30)  | 65.41 ± 17.08<br>(n=50)    | 75.08 ± 20.04<br>(n=50)     |
| <b>Bub3 RNAi</b>               | 35.25 ± 11.54<br>(n=46) | 39.53 ± 11.50***<br>(n=72) | 42.30 ± 9.45***<br>(n=26)   |

Oregon R, wild-type control. Values represent mean pixel intensity per cell ±s.d. *n*, number of cells scored. Cells from five different brains were analysed for each genotype. \*\**P*<0.005; \*\*\**P*<0.0005.

**Table S3. Quantification of cyclin B levels in control and Bub3-depleted cells by RNAi.**

|                  | <b>G1/S</b>                       | <b>G2</b>                           |
|------------------|-----------------------------------|-------------------------------------|
| <b>Control</b>   | 17.098 ± 4.56<br>( <i>n</i> =251) | 38.65 ± 12.89<br>( <i>n</i> =212)   |
| <b>Bub3 RNAi</b> | 16.48 ± 4.88<br>( <i>n</i> =210)  | 25.47 ± 6.32***<br>( <i>n</i> =169) |

Values represent mean pixel intensity per cell ± s.d. *n*, number of cells scored.  
\*\*\**P*<0.0005.

**Table S4. Quantification of cyclin B levels in wild-type cells and after mutation of the APC/C subunit after colchicine incubation.**

| Genotype                                             | G1/S                    | G2                         | Mitosis                    |
|------------------------------------------------------|-------------------------|----------------------------|----------------------------|
| <b>Oregon R</b>                                      | 19.04 ± 6.83<br>(n=166) | 32.36 ± 15.39<br>(n=201)   | 35.34 ± 16.65<br>(n=177)   |
| <i>cdc27/cdc27</i>                                   | 19.95 ± 4.36<br>(n=127) | 51.17 ± 17.20***<br>(n=72) | 75.03 ± 24.87***<br>(n=65) |
| <i>cdc27;bub3<sup>1</sup>/cdc27;bub3<sup>1</sup></i> | 16.39 ± 3.83<br>(n=100) | 32.07 ± 14.7<br>(n=228)    | 28.49 ± 20.51*<br>(n=98)   |

Oregon R, wild-type control. Values represent mean pixel intensity per cell ± s.d. *n*, number of cells scored. Cells from five different brains were analysed for each genotype. \**P*<0.05; \*\*\**P*<0.0005.

**Table S5. Quantification of mitotic parameters in neuroblasts mutated for *bub3* and the APC/C subunit *cdc27*.**

| Genotype                                 | Optical Fields | Mitotic Figures | Prophase          |     | Prometa-Metaphase |      | SCS               |      | Mitotic Index |
|------------------------------------------|----------------|-----------------|-------------------|-----|-------------------|------|-------------------|------|---------------|
|                                          |                |                 | (number of cells) | %   | (number of cells) | %    | (number of cells) | %    |               |
| <b><i>Oregon R</i></b>                   | 1798           | 3876            | 174               | 4.5 | 3675              | 94.8 | 27                | 0.7  | 2.16          |
| <i>cdc27/cdc27</i>                       | 1688           | 4660            | 336               | 7.2 | 4280              | 91.8 | 44                | 0.9  | 2.76          |
| <i>cdc27 bub3<sup>1</sup></i>            | 1202           | 1151            | 49                | 4.3 | 984               | 85.5 | 118               | 10.3 | 0.96          |
| <i>cdc27 bub3<sup>1</sup></i>            |                |                 |                   |     |                   |      |                   |      |               |
| <i>bub3<sup>1</sup>/bub3<sup>1</sup></i> | 1102           | 493             | 70                | 14  | 348               | 70.6 | 75                | 15.2 | 0.45          |

Oregon R, wild-type control. At least five brains were scored for each genotype. SCS, sister chromatid separation.

**Table S6. Quantification of cyclin A levels in control and cells depleted of Bub3 by RNAi.**

|                  | <b>G1/S</b>              | <b>G2</b>                |
|------------------|--------------------------|--------------------------|
| <b>Control</b>   | 23.29 ± 7.65<br>(n=50)   | 49.75 ± 26.03<br>(n=79)  |
| <b>Bub3 RNAi</b> | 5.84 ± 1.59***<br>(n=53) | 8.65 ± 3.59***<br>(n=48) |

Values represent mean pixel intensity per cell ± s.d. *n*, number of cells scored.  
\*\*\**P*<0.0005.

**Table S7. Quantification of cyclin B levels in wild-type and *bubR1*<sup>l</sup> mutant neuroblasts after colchicine incubation.**

|                                 | <b>G1/S</b>             | <b>G2</b>                | <b>Mitosis</b>          |
|---------------------------------|-------------------------|--------------------------|-------------------------|
| <b><i>Oregon R</i></b>          | 20.86 ± 3.16<br>(n=66)  | 33.66 ± 9.50<br>(n=162)  | 34.50 ± 9.15<br>(n=99)  |
| <b><i>bubR1</i><sup>l</sup></b> | 20.41 ± 6.79<br>(n=106) | 33.07 ± 16.37<br>(n=161) | 29 ± 14.87***<br>(n=47) |

Oregon R, wild-type control. Values represent mean pixel intensity per cell ± s.d. *n*, number of cells scored. Cells from five different brains were analysed for each genotype. \*\*\**P*<0.0005.
